# Supplementary material
Source: Springer Nature journal article supplement (https://www.springermedizin.de/resource/supplementary/12889_2009_1843_MOESM1_ESM.pdf/9504166)
Supplement: MOESM1 [file 9504166]

Eligible employees of  
5 OHP group  
practices:

1: n= 131

2: n= 107

3: n= 179

4: n= 180

5: n= 215

Total N=812

Responders (%)

1: n= 85 (65%)

2: n= 87 (81%)

3: n=108 (60%)

4: n= 98 (54%)

5: n=111 (52%)

Total N=489 (60.2%)

Prevalence severe  
MUPS (%)

1: n=12 (14%)

2: n= 9 (10%)

3: n=12 (11%)

4: n= 22 (22%)

5: n=19 (9%)

Total N=74 (15.1%)

Prevalence moderate,  
mild or no MUPS (%)

1: n=73 (86%)

2: n=78 (90%)

3: n=96 (89%)

4: n=76 (78%)

5: n=92 (91%)

N=415 (84.9%)
